# Supplementary material for: Detection of Helicobacter pylori Microevolution and Multiple Infection from Gastric Biopsies by Housekeeping Gene Amplicon Sequencing
Source: MDPI journal article supplement (doi:10.3390/pathogens9020097), 2020-02-05
Supplement: s1 [file s1]

**Supplementary Table S1.** Reference sequences used in this study.

| <i>H. pylori</i><br>strain | <i>cgt</i><br>sequence | <i>luxS</i><br>sequence | Observations                                                                   |
|----------------------------|------------------------|-------------------------|--------------------------------------------------------------------------------|
| 7C                         | CP012905               | CP012905                |                                                                                |
| 29CaP                      | CP012907               | CP012907                |                                                                                |
| 35A                        | CP002096               | CP002096                |                                                                                |
| 51                         | CP000012               | CP000012                |                                                                                |
| 52                         | CP001680               | CP001680                |                                                                                |
| 83                         | CP002605               | CP002605                |                                                                                |
| 908                        | CP002184               | CP002184                | <i>cgt</i> and <i>luxS</i> sequences identical to these from the strain 2017   |
| 2017                       | CP002571               | CP002571                |                                                                                |
| 2018                       | CP002572               | CP002572                | <i>cgt</i> and <i>luxS</i> sequences identical to these from the strain 2017   |
| 26695                      | CP003904               | CP003904                |                                                                                |
| 26695 (2)                  | NC_000915              | NC_000915               | <i>cgt</i> and <i>luxS</i> sequences identical to these from the strain 26695  |
| 26695-1                    | AP013354               | AP013354                | <i>cgt</i> and <i>luxS</i> sequences identical to these from the strain 26695  |
| 26695-1MET                 | CP010436               | CP010436                | <i>cgt</i> and <i>luxS</i> sequences identical to these from the strain 26695  |
| Aklavik86                  | CP003476               | CP003476                |                                                                                |
| Aklavik117                 | CP003483               | CP003483                |                                                                                |
| APP134                     | KU053359               | KU053431                |                                                                                |
| ATCC 49503                 | KU053360               | KU053432                |                                                                                |
| ATCC 51932                 | KU053361               | KU053433                |                                                                                |
| B8                         | NC_014256              | NC_014256               |                                                                                |
| B38                        | NC_012973              | NC_012973               |                                                                                |
| B247                       | KU053362               | KU053434                |                                                                                |
| B271                       | KU053363               | KU053435                |                                                                                |
| B319                       | KU053364               | KU053436                |                                                                                |
| B355                       | KU053365               | KU053437                |                                                                                |
| B373                       | MG950173               | MG950172                |                                                                                |
| B491                       | KU053366               | KU053438                |                                                                                |
| B508S                      | KU053367               | KU053439                |                                                                                |
| B657A-1                    | KU053370               | KU053442                |                                                                                |
| B657C                      | KU053372               | KU053444                |                                                                                |
| B659A                      | KU053373               | KU053445                |                                                                                |
| BM012A                     | CP006888               | CP006888                |                                                                                |
| BM012B                     | CP007605               | CP007605                | <i>luxS</i> sequence identical to that from the strain BM012A                  |
| BM012S                     | CP006889               | CP006889                | <i>cgt</i> and <i>luxS</i> sequences identical to these from the strain BM012A |
| BM013A                     | CP007604               | CP007604                |                                                                                |
| BM013B                     | CP007606               | CP007606                | <i>cgt</i> and <i>luxS</i> sequences identical to these from the strain BM013A |
| CC33C                      | CP011484               | CP011484                |                                                                                |
| CRL122                     | KU053375               | KU053447                |                                                                                |
| Cuz20                      | CP002076               | CP002076                |                                                                                |
| ELS37                      | CP002953               | CP002953                |                                                                                |
| F16                        | AP011940               | AP011940                |                                                                                |
| F30                        | AP011941               | AP011941                |                                                                                |
| F32                        | AP011943               | AP011943                |                                                                                |

|               |           |           |                                                                                |
|---------------|-----------|-----------|--------------------------------------------------------------------------------|
| F57           | AP011945  | AP011945  |                                                                                |
| G27           | NC_011333 | NC_011333 |                                                                                |
| Gambia94/24   | CP002332  | CP002332  |                                                                                |
| Hp238         | CP010013  | CP010013  |                                                                                |
| HPAG1         | NC_008086 | NC_008086 |                                                                                |
| HUP-B14       | NC_017733 | NC_017733 |                                                                                |
| India7        | CP002331  | CP002331  |                                                                                |
| J99           | NC_000921 | NC_000921 |                                                                                |
| J166          | CP007603  | CP007603  | <i>cgt</i> sequence identical to that from the strain B8                       |
| L7            | CP011482  | CP011482  |                                                                                |
| Lithuania75   | CP002334  | CP002334  |                                                                                |
| ML1           | AP014710  | AP014710  |                                                                                |
| ML2           | AP014711  | AP014711  |                                                                                |
| ML3           | AP014712  | AP014712  |                                                                                |
| OK113         | AP012600  | AP012600  | <i>cgt</i> sequence identical to that from the strain F32                      |
| OK310         | AP012601  | AP012601  |                                                                                |
| oki102        | CP006820  | CP006820  |                                                                                |
| oki112        | CP006821  | CP006821  | <i>cgt</i> sequence identical to that from the strain oki102                   |
| oki128        | CP006822  | CP006822  |                                                                                |
| oki154        | CP006823  | CP006823  |                                                                                |
| oki422        | CP006824  | CP006824  | <i>luxS</i> sequence identical to that from the strain oki112                  |
| oki673        | CP006825  | CP006825  | <i>cgt</i> and <i>luxS</i> sequences identical to these from the strain oki128 |
| oki828        | CP006826  | CP006826  | <i>luxS</i> sequence identical to that from the strain oki128                  |
| oki898        | CP006827  | CP006827  | <i>cgt</i> and <i>luxS</i> sequences identical to these from the strain oki112 |
| P12           | NC_011498 | NC_011498 |                                                                                |
| PeCan4        | NC_014555 | NC_014555 |                                                                                |
| PeCan18       | NC_017742 | NC_017742 |                                                                                |
| Puno120       | CP002980  | CP002980  |                                                                                |
| Puno135       | CP002982  | CP002982  | <i>cgt</i> sequence identical to that from the strain F32                      |
| Rif1          | CP003905  | CP003905  | <i>cgt</i> and <i>luxS</i> sequences identical to these from the strain 26695  |
| Rif2          | CP003906  | CP003906  | <i>cgt</i> and <i>luxS</i> sequences identical to these from the strain 26695  |
| Sat464        | CP002071  | CP002071  |                                                                                |
| Shi112        | NC_017741 | NC_017741 | <i>cgt</i> sequence identical to that from the strain Cuz20                    |
| Shi169        | NC_017740 | NC_017740 | <i>cgt</i> sequence identical to that from the strain Sat464                   |
| Shi417        | NC_017739 | NC_017739 | <i>cgt</i> sequence identical to that from the strain Sat464                   |
| Shi470        | NC_010698 | NC_010698 |                                                                                |
| SJM180        | NC_014560 | NC_014560 |                                                                                |
| SNT49         | CP002983  | CP002983  |                                                                                |
| SouthAfrica7  | CP002336  | CP002336  |                                                                                |
| SouthAfrica20 | CP006691  | CP006691  |                                                                                |
| SVC135        | KU053376  | KU053448  |                                                                                |
| UM032         | CP005490  | CP005490  | <i>cgt</i> sequence identical to that from the strain ML2                      |
| UM037         | CP005492  | CP005492  |                                                                                |
| UM066         | CP005493  | CP005493  | <i>cgt</i> sequence identical to that from the strain ML3                      |
| UM298         | CP006610  | CP006610  | <i>cgt</i> and <i>luxS</i> sequences identical to these from the strain UM032  |

|       |          |          |                                                                               |
|-------|----------|----------|-------------------------------------------------------------------------------|
| UM299 | CP005491 | CP005491 | <i>cgt</i> and <i>luxS</i> sequences identical to these from the strain UM032 |
| v225d | CP001582 | CP001582 |                                                                               |
| XZ274 | CP003419 | CP003419 |                                                                               |
